# Supplementary material for: UTag, a cysteine-free thermostable tagging system for tracking single mRNA translation live
Source: Research Square preprint supplement (doi:10.21203/rs.3.rs-9622894/v1), 2026-06-01
Supplement: Supplementary file 2 [file eeb0a42736b9038a0f55fd05.docx]

NCOMMS-26-036434

For peer-review:

**PDB deposition - crystal structures**

Validation reports, maps (.mrc/.mtz/.cif), and model files (.pdb)

[NCOMMS-26-036434 - Data PDB for reviewers](https://springernature-my.sharepoint.com/:f:/p/nrt8606/IgBmMrk-hHRORKk66qMvK6vGAbHGBVQjIs4K7ct2FgYt7l0?e=rXBnMy)
